# Supplementary material
Source: PubMed Central journal article supplement (PMC6140532)
Supplement: pnas.1804672115.sapp.pdf [file pnas.1804672115.sapp.pdf]

## Supplementary Information for

Seroprevalence, risk factor, and spatial analyses of Zika virus infection after the 2016 epidemic in Managua, Nicaragua

José Victor Zambrana<sup>1\*</sup>, Fausto Bustos Carrillo<sup>2,3\*</sup>, Raquel Burger-Calderon<sup>1,2</sup>, Damaris Collado<sup>1</sup>, Nery Sanchez<sup>1</sup>, Sergio Ojeda<sup>1</sup>, Jairo Carey Monterrey<sup>1</sup>, Miguel Plazaola<sup>1</sup>, Brenda Lopez<sup>1</sup>, Sonia Arguello<sup>1</sup>, Douglas Elizondo<sup>1</sup>, William Aviles<sup>1</sup>, Josefina Coloma<sup>2</sup>, Guillermina Kuan<sup>4</sup>, Angel Balmaseda<sup>1,5</sup>, Aubree Gordon<sup>6</sup>, Eva Harris<sup>2\*\*</sup>

<sup>1</sup>Sustainable Sciences Institute, Managua, Nicaragua;

<sup>2</sup>Division of Infectious Diseases and Vaccinology, School of Public Health, University of California, Berkeley, Berkeley, CA, USA;

<sup>3</sup>Division of Epidemiology, School of Public Health, University of California, Berkeley, Berkeley, CA USA;

<sup>4</sup>Health Center Sócrates Flores Vivas, Ministry of Health, Managua, Nicaragua;

<sup>5</sup>Laboratorio Nacional de Virología, Centro Nacional de Diagnóstico y Referencia, Ministry of Health, Managua, Nicaragua;

<sup>6</sup>Department of Epidemiology, School of Public Health, University of Michigan, Ann Arbor, MI, USA

\*These authors contributed equally to the work

\*\*Corresponding Author

Email: [eharris@berkeley.edu](mailto:eharris@berkeley.edu)

### **This PDF file includes:**

Supplementary text

Figs. S1

Tables S1 to S6

References for SI reference citations

## **SI Materials and Methods**

**Survey data:** All surveys were administered orally, and answers were recorded on smartphones or tablet computers using custom-built software (1). Two questionnaires were administered per study, one for every household and one for every participant. The participant questionnaires covered demographic information such as sex, age, and level of education. The household questionnaires for both studies were similar and included questions on assets and conditions of the home, which served to determine a household's asset-based wealth index. The wealth index was based on: household construction material; number of fans, TVs, and refrigerators; ownership of motorcycles and/or cars; and use of firewood for cooking. We used principal components analysis to determine the weights for an index of the asset variables based on the score of the first principal component (PC1). The index was divided into terciles using quantile regression with the number of people living in each house used as a vector of observation weights for minimizing the sum of the weights multiplied into the absolute residuals. The wealth index was constructed using a principal component analysis (PCA) in R (2-5). PCA analyses were run separately for both study cohorts. To reflect the SES level of the study area, households were categorized as not poor, poor, and very poor according to their tercile along the first principal component. Individual participants were then assigned the SES proxy category of their household. Each participant's height and weight were also measured (6). The questionnaires, administered several months after the end of the epidemic, did not retrospectively ask about symptoms during the timeframe of the epidemic.

**Zika NS1 BOB ELISA:** As described previously (7, 8), 1  $\mu\text{g/ml}$  of ZIKV NS1 (MR766 strain, Native Antigen Company, Inc.) diluted in Phosphate-buffered Saline (PBS) was coated overnight at 4°C onto polystyrene Maxisorp plates (Nunc Thermo Scientific). Plates were blocked for 1 hour with PBS containing 1% Bovine Serum Albumin (PBS-BSA) and then washed 2 times with PBS plus 0.05% Tween 20 (PBS-T). Sera and internal controls (known positive and negative samples)

were added at a 1:10 dilution in PBS-BSA to the plates. Four wells were designated for the negative (maximum optical density (OD) value) controls and four wells for the positive (minimum OD value) controls. After 1 hour, 20 ng/ml biotinylated anti-NS1 ZKA35 (Humabs Biomed S.A.) was added 1:1 and incubated for 15 minutes. Following this, plates were washed with PBS-T four times, and alkaline phosphatase-conjugated streptavidin (Jackson ImmunoResearch) was added for 1 hour. Plates were washed with PBS-T 5 times, and para-nitrophenylphosphate (*p*NPP, Sigma) diluted in carbonate-bicarbonate buffer was added for 20 minutes. All incubation steps were performed at room temperature except for the coating, which was done at 4°C. OD was then measured using a Microplate Photometer at 405 nm. The percentage of blockade-of-binding value (%BOB) was calculated as follows:

$$\%BOB = \left[ 1 - \left( \frac{OD_{sample} - OD_{minimum\ value}}{\delta} \right) \right] \times 100\%, \text{ where}$$

$\delta = OD_{\text{maximum value}} - OD_{\text{minimum value}}$ . The positivity cut-off was set at 50%, where readings of 50% or above were considered BOB-positive.

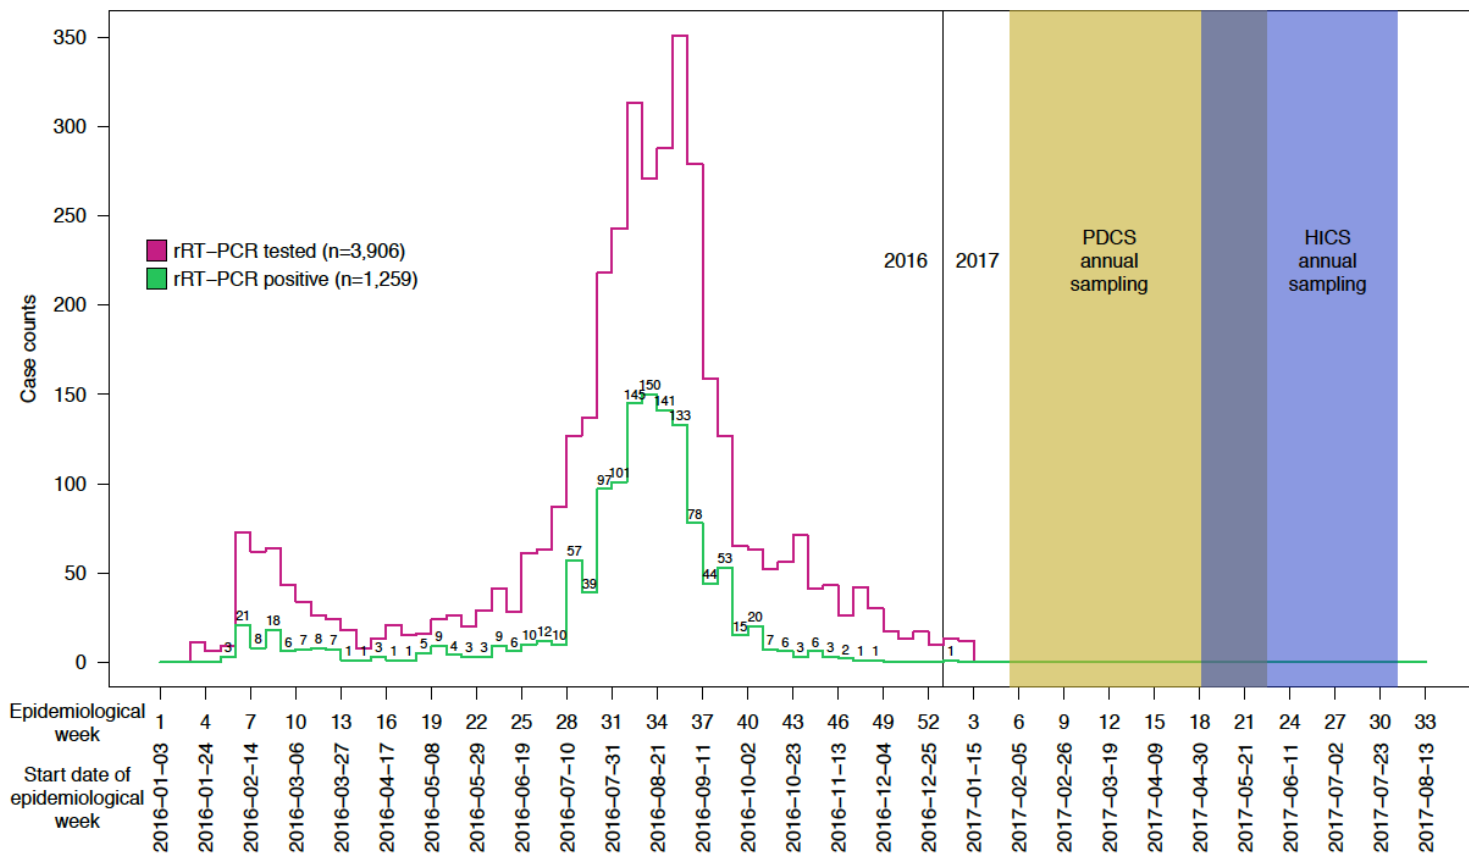

**Fig. S1. Zika epidemic curve for Managua, Nicaragua.** National surveillance data from the Nicaraguan Ministry of Health, restricted to Managua, is shown. National surveillance was resource-limited, and the data mostly reflects testing of pregnant women in Managua. However, the epidemic curve mirrors the epidemic as seen in the Pediatric Dengue Cohort Study (PDCS). Total individuals tested and rRT-PCR-confirmed cases are shown in pink and green, respectively. The duration of the annual sampling for the PDCS and the Household Influenza Cohort Study (HICS) is shown in yellow and blue, respectively.

**Table S1. Characteristics of the pediatric, adult, and household groups who participated in the annual sampling from February to May 2017.**

|                                                              | <b>Pediatric group<br/>(2-15 years old)</b> | <b>Adult group<br/>(15-80 years old)</b> | <b>Household group<br/>(2-80 years old)</b> |
|--------------------------------------------------------------|---------------------------------------------|------------------------------------------|---------------------------------------------|
| <b>Participants - N</b>                                      | 3740                                        | 1074                                     | 2147                                        |
| <b>Households - N</b>                                        | 2127                                        | 433                                      | 433                                         |
| <b>Persons per household -<br/>mean (standard deviation)</b> | 1.76 (1.13)                                 | 2.48 (1.49)                              | 4.96 (2.49)                                 |
| <b>Female sex - N (%)</b>                                    | 1850 (49.47)                                | 770 (71.69)                              | 1306 (60.83)                                |
| <b>Age - median (IQR*)</b>                                   | 7 (4-10)                                    | 32 (24-42)                               | 15 (7-32)                                   |
| <b>Age Groups (years) - N (%)</b>                            |                                             |                                          |                                             |
| <b>2-4</b>                                                   | 964 (25.78)                                 | -                                        | 287 (13.37)                                 |
| <b>5-9</b>                                                   | 1545 (41.31)                                | -                                        | 433 (20.17)                                 |
| <b>10-14</b>                                                 | 1231 (32.91)                                | -                                        | 383 (17.84)                                 |
| <b>15-29</b>                                                 | -                                           | 442 (41.15)                              | 412 (19.19)                                 |
| <b>30-44</b>                                                 | -                                           | 402 (37.43)                              | 402 (18.72)                                 |
| <b>45-59</b>                                                 | -                                           | 140 (13.04)                              | 140 (6.52)                                  |
| <b>60-74</b>                                                 | -                                           | 77 (7.17)                                | 77 (3.59)                                   |
| <b>&gt;75</b>                                                | -                                           | 13 (1.21)                                | 13 (0.61)                                   |
| <b>Body surface area (m<sup>2</sup>) -<br/>median (IQR*)</b> | 0.91 (0.70 - 1.20)                          | 1.75 (1.60 - 1.92)                       | 1.45 (0.90 - 1.76)                          |
| <b>Socioeconomic status - N (%)</b>                          |                                             |                                          |                                             |
| <b>Not poor</b>                                              | 1384 (37.69)                                | 391 (36.41)                              | 807 (40.01)                                 |
| <b>Poor</b>                                                  | 1229 (33.47)                                | 355 (33.05)                              | 644 (31.93)                                 |
| <b>Poorest</b>                                               | 1059 (28.84)                                | 328 (30.54)                              | 566 (28.06)                                 |
| <b>Daily Hours Without Water -<br/>N (%)</b>                 |                                             |                                          |                                             |
| <b>0</b>                                                     | 2464 (67.1)                                 | 660 (61.45)                              | 1261 (62.52)                                |
| <b>1-7</b>                                                   | 544 (14.81)                                 | 188 (17.5)                               | 346 (17.15)                                 |
| <b>&gt; 7</b>                                                | 664 (18.08)                                 | 226 (21.04)                              | 410 (20.33)                                 |
| <b>Faucet outside the home - N (%)</b>                       |                                             |                                          |                                             |
| <b>No</b>                                                    | 1764 (48.04)                                | 359 (33.43)                              | 817 (40.51)                                 |
| <b>Yes</b>                                                   | 1908 (51.96)                                | 715 (66.57)                              | 1200 (59.49)                                |
| <b>School shift - N (%)</b>                                  |                                             |                                          |                                             |
| <b>Morning</b>                                               | 2512 (67.33)                                | -                                        | -                                           |
| <b>Afternoon</b>                                             | 647 (17.34)                                 | -                                        | -                                           |
| <b>Not attending school</b>                                  | 572 (15.33)                                 | -                                        | -                                           |
| <b>Store water - N (%)</b>                                   |                                             |                                          |                                             |
| <b>No</b>                                                    | -                                           | 629 (58.57)                              | -                                           |
| <b>Yes</b>                                                   | -                                           | 445 (41.43)                              | -                                           |

\*Inter-quartile range

**Table S2. Breakdown of the pediatric group (from the PDCS cohort) by BMI after considering participants' age and sex.**

| <b>Pediatric group sub-populations by BMI for age and sex</b> | <b>N</b> | <b>%</b> |
|---------------------------------------------------------------|----------|----------|
| <b>Underweight: 0-5th percentile</b>                          | 128      | 3.43     |
| <b>Healthy: 6-84th percentile</b>                             | 2398     | 64.31    |
| <b>Overweight: 85-94th percentile</b>                         | 502      | 13.46    |
| <b>Obese: 95-100th percentile</b>                             | 701      | 18.80    |

**Table S3. Breakdown of the adult group (from the HICS cohort) by BMI.**

| <b>Adult group sub-populations<br/>by BMI</b> | <b>N</b> | <b>%</b> |
|-----------------------------------------------|----------|----------|
| <b>Underweight: 14.6-18.5</b>                 | 39       | 3.72     |
| <b>Healthy: 18.5-25.0</b>                     | 258      | 24.59    |
| <b>Overweight: 25.1-30.0</b>                  | 308      | 29.36    |
| <b>Obese: 30.1-40.0</b>                       | 362      | 34.51    |
| <b>Morbidly obese: 40.1-54.3</b>              | 82       | 7.82     |

**Table S4. QIC<sub>u</sub> comparisons in binomial GEE models adjusted for SES, hours without household access to water, and location of faucet.**

| <b>QIC<sub>u</sub></b>     | <b>BSA</b> | <b>BMI percentiles<br/>for age and sex</b> | <b>BMI</b> | <b>Height</b> |
|----------------------------|------------|--------------------------------------------|------------|---------------|
| <b>Pediatric<br/>group</b> | 4394.9     | 4560.0                                     | 4460.9     | 4420.2        |
| <b>Adult<br/>group</b>     | 1448.4     | NA                                         | 1445.6     | 1443.0        |

Note: A smaller QIC<sub>u</sub> statistic indicates a better fit to the data.



**Table S5. Risk factor analysis of the pediatric group (n=3,740)**

|                                          | N (%)        | Prevalence (95% CI) | Prevalence ratio (95% CI) | p-value           | Adjusted prevalence ratio (95% CI) | p-value      |
|------------------------------------------|--------------|---------------------|---------------------------|-------------------|------------------------------------|--------------|
| <b>Total</b>                             | 3740 (100)   | 36.11 (34.45-37.8)  |                           |                   |                                    |              |
| <b>Male</b>                              | 1890 (50.53) | 33.6 (31.39-35.88)  | 1                         |                   | 1                                  |              |
| <b>Female</b>                            | 1850 (49.47) | 38.54 (36.28-40.86) | <b>1.15 (1.06-1.25)</b>   | <b>0.0013</b>     | <b>1.11 (1.02-1.21)</b>            | <b>0.014</b> |
| <b>Age Groups (years)</b>                |              |                     |                           |                   |                                    |              |
| <b>2-4</b>                               | 964 (25.78)  | 24.26 (21.65-27.08) | 1                         |                   | 1                                  |              |
| <b>5-9</b>                               | 1545 (41.31) | 32.32 (29.95-34.79) | <b>1.34 (1.18-1.53)</b>   | <b>&lt; 0.001</b> | 1.02 (0.81-1.28)                   | 0.873        |
| <b>10-14</b>                             | 1231 (32.91) | 49.85 (46.98-52.72) | <b>2.07 (1.83-2.33)</b>   | <b>&lt; 0.001</b> | 1.24 (0.95-1.63)                   | 0.117        |
| <b>Body surface area (m<sup>2</sup>)</b> |              |                     |                           |                   |                                    |              |
| <b>1st quintile</b>                      | 714 (20.01)  | 24.01 (21.03-27.26) | <b>0.69 (0.59-0.81)</b>   | <b>&lt; 0.001</b> | <b>0.73 (0.55-0.97)</b>            | <b>0.03</b>  |
| <b>2nd quintile</b>                      | 713 (19.98)  | 27.46 (24.26-30.91) | <b>0.8 (0.69-0.93)</b>    | <b>0.0044</b>     | <b>0.83 (0.7-0.98)</b>             | <b>0.032</b> |
| <b>3rd quintile</b>                      | 714 (20.01)  | 34.68 (31.24-38.29) | 1                         |                   | 1                                  |              |
| <b>4th quintile</b>                      | 713 (19.98)  | 41.43 (37.77-45.2)  | <b>1.21 (1.06-1.37)</b>   | <b>0.0038</b>     | 1.08 (0.93-1.27)                   | 0.312        |
| <b>5th quintile</b>                      | 714 (20.01)  | 53.28 (49.57-56.95) | <b>1.55 (1.38-1.74)</b>   | <b>&lt; 0.001</b> | <b>1.28 (1.07-1.52)</b>            | <b>0.006</b> |
| <b>Socioeconomic status</b>              |              |                     |                           |                   |                                    |              |
| <b>Not poor</b>                          | 1384 (37.69) | 34.46 (31.71-37.31) | 1                         |                   | 1                                  |              |
| <b>Poor</b>                              | 1229 (33.47) | 35.98 (33.16-38.9)  | 1.05 (0.93-1.17)          | 0.447             | 1.04 (0.93-1.17)                   | 0.495        |
| <b>Poorest</b>                           | 1059 (28.84) | 38.55 (35.46-41.74) | 1.12 (1-1.26)             | 0.0558            | 1.10 (0.98-1.24)                   | 0.094        |
| <b>Daily Hours Without Water</b>         |              |                     |                           |                   |                                    |              |
| <b>0</b>                                 | 2464 (67.1)  | 35.79 (33.73-37.9)  | 1                         |                   | 1                                  |              |
| <b>1 - 7</b>                             | 544 (14.81)  | 36.21 (32.23-40.4)  | 1.01 (0.89-1.15)          | 0.8235            | 1.02 (0.90-1.16)                   | 0.743        |
| <b>&gt; 7</b>                            | 664 (18.08)  | 37.78 (33.82-41.91) | 1.06 (0.93-1.19)          | 0.3892            | 1.08 (0.96-1.22)                   | 0.216        |
| <b>Faucet outside the home</b>           |              |                     |                           |                   |                                    |              |
| <b>No</b>                                | 1764 (48.04) | 36.14 (33.74-38.61) | 1                         |                   | 1                                  |              |
| <b>Yes</b>                               | 1908 (51.96) | 36.25 (33.93-38.64) | 1.00 (0.91-1.10)          | 0.957             | 1.00 (0.91-1.10)                   | 0.985        |
| <b>School attendance period</b>          |              |                     |                           |                   |                                    |              |
| <b>Morning</b>                           | 2512 (67.17) | 36.43 (34.45-38.46) | 1                         |                   | 1                                  |              |
| <b>Afternoon</b>                         | 647 (17.3)   | 44.89 (41-48.84)    | <b>1.24 (1.13-1.37)</b>   | <b>&lt; 0.001</b> | 1.09 (0.99-1.21)                   | 0.093        |
| <b>Not attending school</b>              | 572 (15.33)  | 23.95 (20.64-27.6)  | <b>0.66 (0.57-0.76)</b>   | <b>&lt; 0.001</b> | 0.99 (0.8-1.22)                    | 0.932        |

**Table S6. Risk factor analysis of the adult group (n=1,074)**

|                                          | N (%)       | Prevalence (95% CI) | Prevalence ratio (95% CI) | p-value     | Adjusted prevalence ratio (95% CI) | p-value      |
|------------------------------------------|-------------|---------------------|---------------------------|-------------|------------------------------------|--------------|
| <b>Total</b>                             | 1074        | 56.36 (53.1-59.56)  |                           |             |                                    |              |
| <b>Male</b>                              | 304 (28.31) | 51.57 (46.01-57.09) | 1                         |             | 1                                  |              |
| <b>Female</b>                            | 770 (71.69) | 57.87 (54.21-61.45) | 1.11 (0.99-1.25)          | 0.07        | <b>1.14 (1.01-1.28)</b>            | <b>0.041</b> |
| <b>Age Groups (years)</b>                |             |                     |                           |             |                                    |              |
| <b>15-29</b>                             | 442 (41.15) | 51.55 (46.72-56.35) | 0.92 (0.82-1.04)          | 0.19        | 0.94 (0.82-1.07)                   | 0.328        |
| <b>30-44</b>                             | 402 (37.43) | 55.97 (51.13-60.69) | 1                         |             | 1                                  |              |
| <b>45-59</b>                             | 140 (13.04) | 61.37 (52.75-69.32) | 1.08 (0.92-1.26)          | 0.33        | 1.08 (0.92-1.27)                   | 0.335        |
| <b>60-74</b>                             | 77 (7.17)   | 69.12 (57.58-78.69) | <b>1.21 (1.02-1.45)</b>   | <b>0.03</b> | <b>1.24 (1.03-1.49)</b>            | <b>0.024</b> |
| <b>&gt;75</b>                            | 13 (1.21)   | 69.23 (40.93-87.96) | 1.22 (0.84-1.78)          | 0.31        | 1.39 (0.99-1.96)                   | 0.059        |
| <b>Body surface area (m<sup>2</sup>)</b> |             |                     |                           |             |                                    |              |
| <b>1st quintile</b>                      | 210 (20.02) | 54.68 (47.99-61.21) | 0.96 (0.8-1.14)           | 0.615       | 0.97 (0.82-1.16)                   | 0.772        |
| <b>2nd quintile</b>                      | 210 (20.02) | 52.91 (45.76-59.94) | 1.11 (0.95-1.29)          | 0.19        | 1.1 (0.95-1.29)                    | 0.201        |
| <b>3rd quintile</b>                      | 209 (19.92) | 60.9 (54.57-66.88)  | 1                         |             | 1                                  |              |
| <b>4th quintile</b>                      | 210 (20.02) | 54.49 (47.93-60.91) | 1.00 (0.85-1.17)          | 0.97        | 1.01 (0.86-1.19)                   | 0.907        |
| <b>5th quintile</b>                      | 210 (20.02) | 58.96 (52.04-65.53) | 1.08 (0.91-1.27)          | 0.39        | 1.11 (0.94-1.31)                   | 0.208        |
| <b>Socioeconomic status</b>              |             |                     |                           |             |                                    |              |
| <b>Not poor</b>                          | 391 (36.41) | 52.74 (47.25-58.17) | 1                         |             | 1                                  |              |
| <b>Poor</b>                              | 355 (33.05) | 57.18 (51.71-62.47) | 1.09 (0.94-1.25)          | 0.25        | 1.06 (0.92-1.22)                   | 0.435        |
| <b>Poorest</b>                           | 328 (30.54) | 59.29 (53.35-64.97) | 1.12 (0.97-1.29)          | 0.12        | 1.11 (0.96-1.28)                   | 0.167        |
| <b>Daily Hours Without Water</b>         |             |                     |                           |             |                                    |              |
| <b>0</b>                                 | 660 (61.45) | 56.02 (51.95-60.02) | 1                         |             | 1                                  |              |
| <b>1 - 7</b>                             | 188 (17.5)  | 57.62 (49.57-65.28) | 1.03 (0.88-1.2)           | 0.745       | 1.03 (0.87-1.21)                   | 0.764        |
| <b>&gt; 7</b>                            | 226 (21.04) | 56.69 (49.37-63.74) | 1.00 (0.86-1.16)          | 1.00        | 1.04 (0.88-1.22)                   | 0.649        |
| <b>Faucet outside the home</b>           |             |                     |                           |             |                                    |              |
| <b>No</b>                                | 359 (33.43) | 54.18 (48.89-59.38) | 1                         |             | 1                                  |              |
| <b>Yes</b>                               | 715 (66.57) | 57.48 (53.36-61.49) | 1.05 (0.93-1.19)          | 0.40        | 1.02 (0.9-1.15)                    | 0.768        |
| <b>Store water</b>                       |             |                     |                           |             |                                    |              |
| <b>No</b>                                | 629 (58.57) | 56.78 (52.7-60.78)  | 1                         |             | 1                                  |              |
| <b>Yes</b>                               | 445 (41.43) | 56.07 (50.78-61.22) | 0.98 (0.87-1.1)           | 0.69        | 0.96 (0.84-1.09)                   | 0.526        |

## References

1. Kuan G, *et al.* (2009) The Nicaraguan pediatric dengue cohort study: study design, methods, use of information technology, and extension to other infectious diseases. *Am J Epidemiol* 170(1):120-129.
2. Vyas S & Kumaranayake L (2006) Constructing socio-economic status indices: how to use principal components analysis. *Health Policy Plan* 21(6):459-468.
3. Lalloue B, *et al.* (2013) A statistical procedure to create a neighborhood socioeconomic index for health inequalities analysis. *Int J Equity Health* 12:21.
4. Hoque S (2014) *Asset-based poverty analysis in rural Bangladesh: A comparison of principal component analysis and fuzzy set theory.*
5. R Core Team (2017) R: A language and environment for statistical computing: R Foundation for Statistical Computing, Vienna, Austria. [Available from: <https://www.R-project.org/>].
6. Gordon A, *et al.* (2015) The Nicaraguan pediatric influenza cohort study: design, methods, use of technology, and compliance. *BMC Infect Dis* 15:504.
7. Balmaseda A, *et al.* (2018) Comparison of Four Serological Methods and Two Reverse Transcription-PCR Assays for Diagnosis and Surveillance of Zika Virus Infection. *J Clin Microbiol* 56(3).
8. Balmaseda A, *et al.* (2017) Antibody-based assay discriminates Zika virus infection from other flaviviruses. *Proc Natl Acad Sci U S A* 114(31):8384-8389.
